# Supplementary material for: SAMHD1-induced endosomal FAK signaling promotes human renal clear cell carcinoma metastasis by activating Rac1-mediated lamellipodia protrusion
Source: PubMed Central journal article supplement (PMC10167369; doi:10.1038/s12276-023-00961-x), 2023-04-03
Supplement: 12276_2023_961_MOESM1_ESM.pdf [file 12276_2023_961_MOESM1_ESM.pdf]

# Supplementary 1. *An et al.*

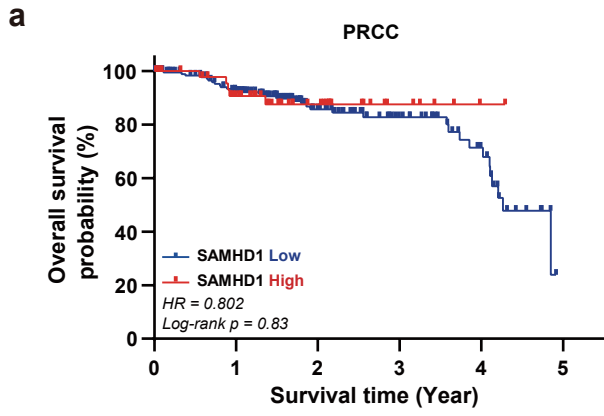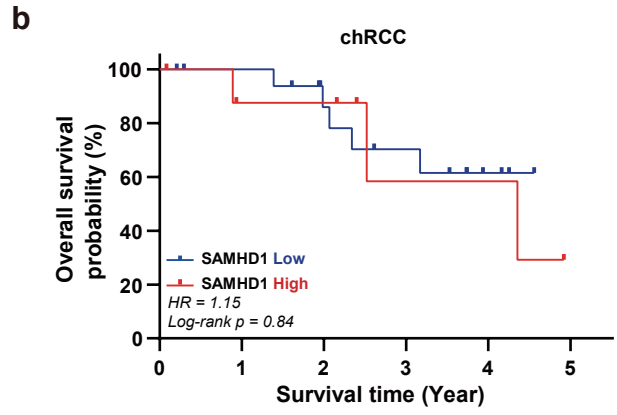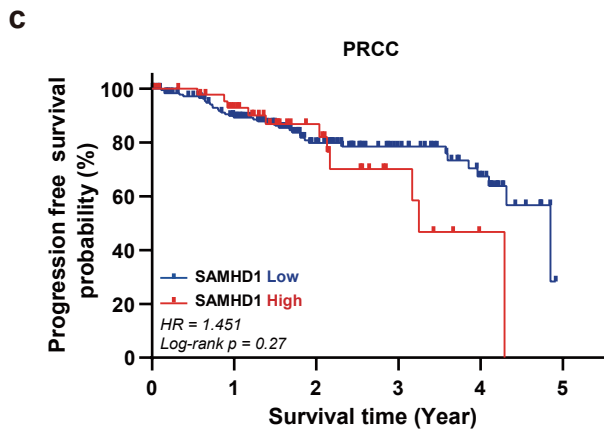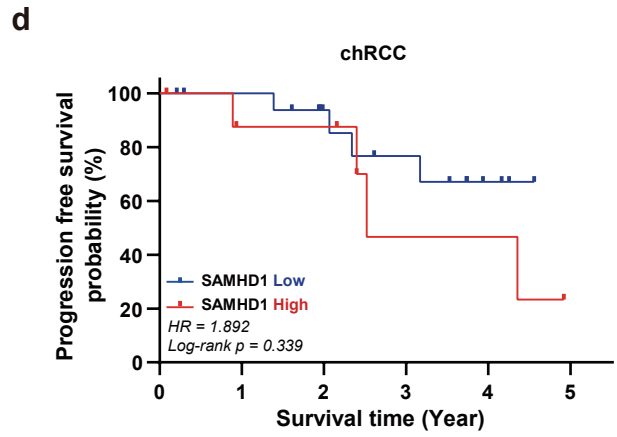

# Supplementary 2. *An et al.*

**a**

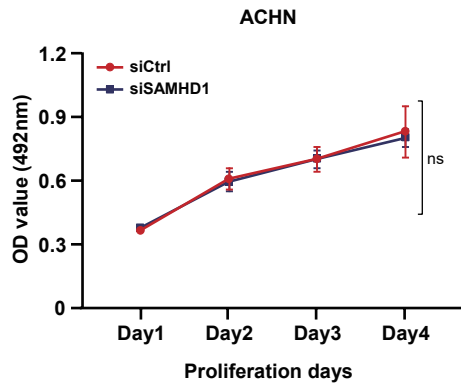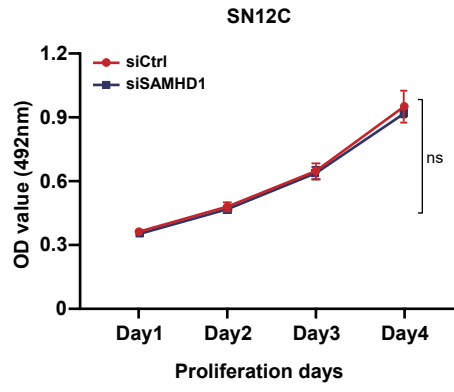

**b**

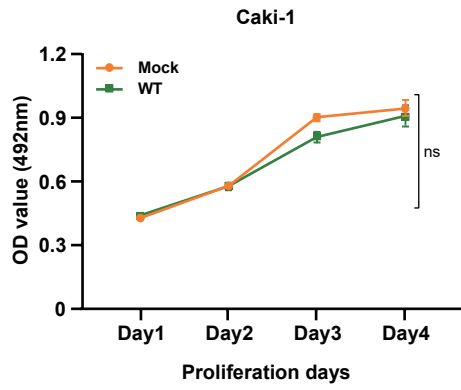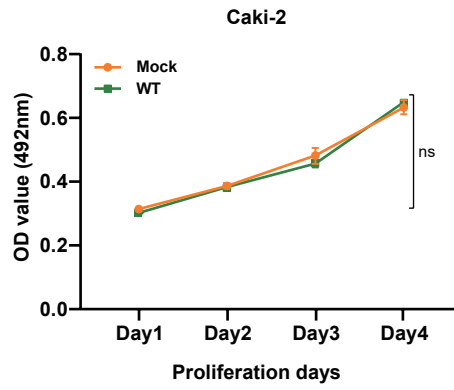

# Supplementary 3. *An et al.*

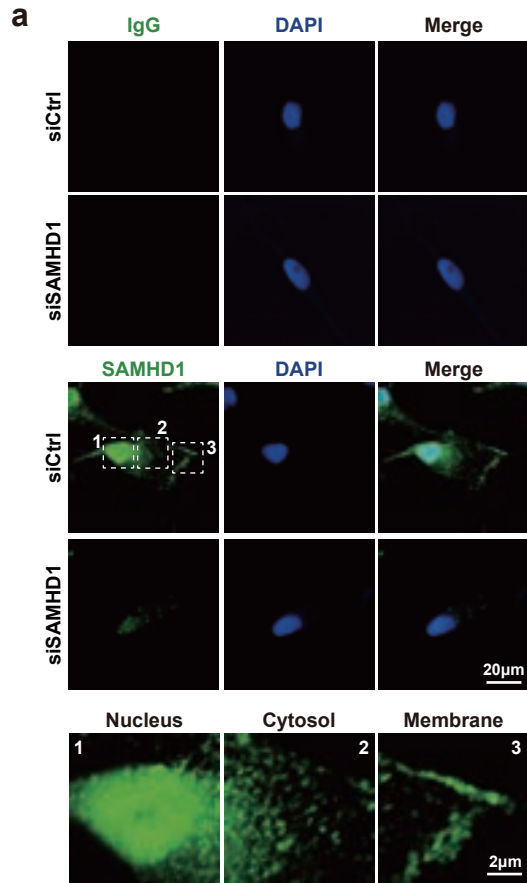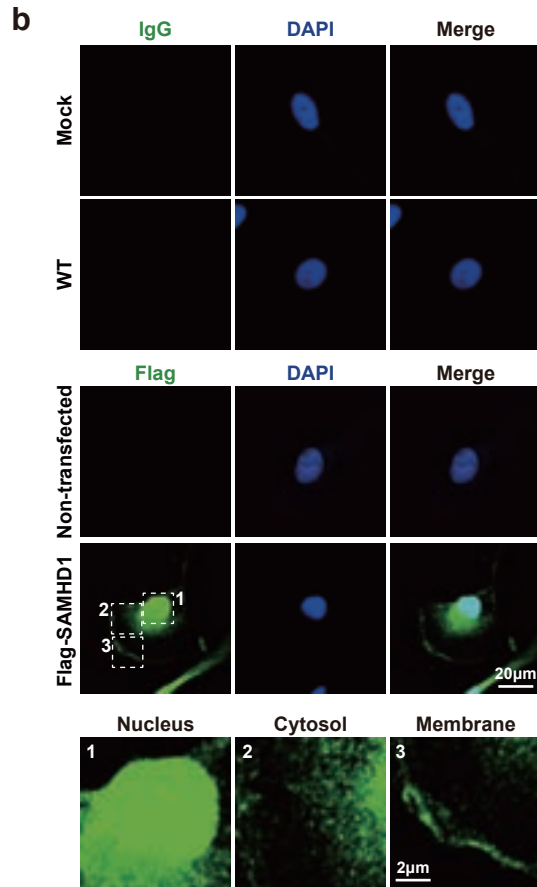

1 **Supplementary Information**

2

3 **Supplementary Fig. S1. SAMHD1 does not affect patient survival rates in the renal**  
4 **papillary cell carcinoma (PRCC) and kidney chromophobe (chRCC) subtypes.**

5 **(a)** Kaplan–Meier analysis of 5-year overall survival (OS) between PRCC patient groups with  
6 high (n = 50) and low SAMHD1 expression (n = 187). Log-rank  $p = 0.83$ . **(b)** Kaplan–Meier  
7 analysis of 5-year OS between chRCC patient groups with high (n = 9) and low SAMHD1  
8 expression (n = 18). Log-rank  $p = 0.84$ . **(c)** Kaplan–Meier analysis of 5-year progression-free  
9 survival (PFS) between PRCC patient groups with high (n = 49) and low SAMHD1 expression  
10 (n = 186). Log-rank  $p = 0.27$ . **(d)** Kaplan–Meier analysis of 5-year PFS between chRCC patient  
11 groups with high (n = 9) and low SAMHD1 expression (n = 18). Log-rank  $p = 0.339$ .

12

13 **Supplementary Fig. S2. SAMHD1 does not affect cell proliferation**

14 **(a, b)** Cell proliferation assay was performed using MTS reagent in SAMHD1-knockdown  
15 ACHN (left) and SN12C cells (right) **(a)** or SAMHD1-overexpressed Caki-1 (left) and Caki-2  
16 cells (right) **(b)**. Data are presented as the mean  $\pm$  SD of three independent experiments.

17

18 **Supplementary Fig. S3. SAMHD1 mainly localizes in the nucleus and partially in the**  
19 **cytoplasm and cell membrane.**

20 **(a)** IF with anti-IgG (negative control), anti-SAMHD1 antibodies, and 4',6-diamidino-2-  
21 phenylindole (DAPI) staining of SAMHD1-knockdown Caki-1 cells. **(b)** IF staining with anti-

22 Flag antibody and DAPI of SAMHD1-overexpressed Caki-1 cells. Anti-IgG antibody was used  
23 as a negative control.
